# Supplementary material
Source: publisher figshare collection journal article supplement (https://sage.figshare.com/ndownloader/files/16639001)
Supplement: Supplementary file 1 [file 16639001]

Supplemental Table 1. *Means, Standard Deviations, Skew, Kurtosis for Items Contributing to the Black Community Activism Orientation Scale (N=446)*

| Item                                                                                                                                     | <i>M</i> | <i>SD</i> | <i>Skew</i> | <i>Kurtosis</i> |
|------------------------------------------------------------------------------------------------------------------------------------------|----------|-----------|-------------|-----------------|
| <b>Factor 1: Low-Risk Activism Orientation</b>                                                                                           |          |           |             |                 |
| Display a poster or bumper sticker with a political message specific to the BC                                                           | 3.03     | 1.25      | -.11        | 2.05            |
| Purchase a poster, t-shirt, etc. that endorses a political point of view specific to the BC                                              | 3.29     | 1.24      | -.32        | 2.17            |
| Go out of your way to collect information on a social or political issue specific to the BC                                              | 3.03     | 1.25      | -.09        | 2.04            |
| Present facts to contest another person's social or political statement about the BC                                                     | 3.16     | 1.23      | -.27        | 2.17            |
| Confront jokes, statements, or innuendos that oppose the BC                                                                              | 3.33     | 1.32      | -.40        | 2.04            |
| Boycott a product for political reasons specific to the BC                                                                               | 2.90     | 1.26      | .04         | 2.02            |
| Sign a petition for a political cause specific to the BC                                                                                 | 3.32     | 1.24      | -.37        | 2.21            |
| Try to change a friend's or acquaintance's mind about a social or political issue specific to the BC                                     | 3.22     | 1.22      | -.27        | 2.17            |
| Try to change a relative's mind about a social or political issue specific to the BC                                                     | 3.20     | 1.23      | -.26        | 2.17            |
| Wear a t-shirt or button with a political message about the BC                                                                           | 3.37     | 1.28      | -.41        | 2.13            |
| Teach or mentor in the BC                                                                                                                | 3.24     | 1.24      | -.26        | 2.13            |
| <b>Factor 2: High-Risk Activism Orientation</b>                                                                                          |          |           |             |                 |
| Engage in a political activity related to the BC in which you knew you will be arrested                                                  | 2.43     | 1.26      | .47         | 2.19            |
| Engage in a physical confrontation at a political rally specific to the BC                                                               | 2.34     | 1.25      | .55         | 2.24            |
| Engage in a political activity specific to the BC in which you feared that some of your possessions would be damaged                     | 2.49     | 1.25      | .41         | 2.18            |
| Engage in an illegal act as part of a political protest specific to the BC                                                               | 2.14     | 1.22      | .80         | 2.63            |
| Engage in a political activity specific to the BC in which you suspect there would be a confrontation with the police or possible arrest | 2.50     | 1.27      | .41         | 2.14            |
| Block access to a building or public area with your body for a cause related to the BC                                                   | 2.27     | 1.18      | .63         | 2.52            |
| Engage in any political activity specific to the BC in which you fear for your personal safety                                           | 2.53     | 1.26      | .40         | 2.17            |
| <b>Factor 3: Formal Political Activism Orientation</b>                                                                                   |          |           |             |                 |
| Organize a political event (e.g., talk, support group, march) specific to the BC                                                         | 2.66     | 1.19      | .25         | 2.25            |
| Give a lecture or talk about a social or political issue specific to the BC                                                              | 2.78     | 1.22      | .18         | 2.15            |
| Donate money to a political candidate who supports Black issues                                                                          | 3.02     | 1.20      | -.10        | 2.15            |
| Send a letter or e-mail expressing a political opinion specific to the BC to the editor of a periodical or television show               | 2.72     | 1.20      | .26         | 2.24            |
| Send a letter or e-mail to a public official about a political issue specific to the BC                                                  | 2.72     | 1.20      | .26         | 2.24            |
| Attend a regular planning meeting for political organization that supports Black issues                                                  | 2.89     | 1.18      | .01         | 2.18            |
| Keep track of views of members of Congress regarding an issue important to the BC                                                        | 3.10     | 1.32      | -.20        | 1.94            |
| Campaign by phone for a political candidate who supports Black issues                                                                    | 2.62     | 1.21      | .34         | 2.21            |
